# Supplementary material
Source: PubMed Central journal article supplement (PMC3761008)
Supplement: supp_121771_angio-antoniou-2-at.pdf [file supp_121771_angio-antoniou-2-at.pdf]

## **Appendix 2 (as supplied by the authors): Covariates Included in Multivariable Model**

### Medication use in previous year

- Amiodarone
- Angiotensin converting enzyme inhibitors
- Aldosterone antagonists
- Aspirin and other anti-platelet drugs
- Beta-adrenergic receptor antagonists
- Calcium channel blockers
- Digoxin
- Diuretics (Potassium and non-potassium sparing)
- Other antihypertensives
- Nitrates
- Statins
- Non-steroidal anti-inflammatory drugs
- Warfarin

### Diabetes treatment

- Acarbose
- Insulin
- Metformin
- Repaglinide
- Sulfonylureas
- Thiazolidinediones

### Number of prescription drugs in past year

Sex

Age

Socioeconomic status (income quintiles)

Congestive heart failure

Angina

Atrial fibrillation

Ventricular dysrhythmias

Hypertension

Peripheral vascular disease

Percutaneous coronary intervention

Coronary artery bypass grafting

Chronic liver disease

Chronic kidney disease

Charlson co-morbidity index

Living in long-term care facility

Number of years of spironolactone treatment
